# Supplementary material for: Generation of Photonic Hooks under Point-Source Illumination from Patchy Microcylinders
Source: MDPI journal article supplement (doi:10.3390/photonics9090667), 2022-09-19
Supplement: s1 [file s1]

## Supplementary Materials

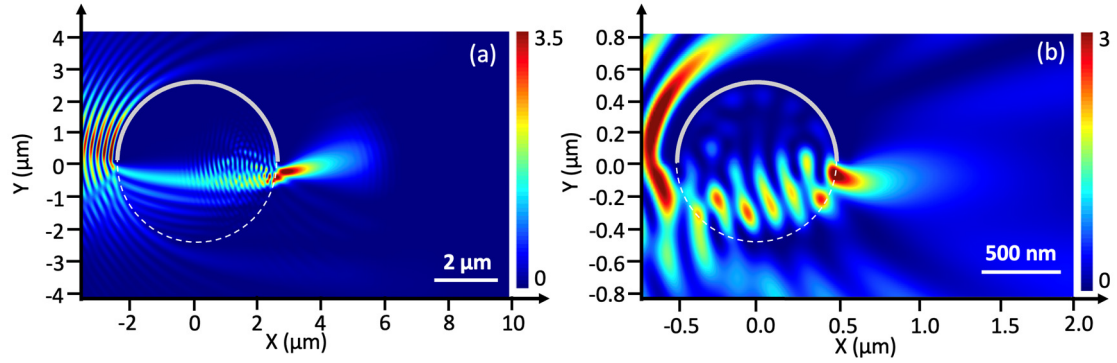

Figure S1. The light fields generated by patchy microcylinders under Gaussian beam illumination. The refractive index of the microcylinders and the background is 1.9 and 1.33, respectively. The diameter of the microcylinder is (a) 5  $\mu\text{m}$  and (b) 1  $\mu\text{m}$ .

Table S1. Characteristics of the light fields generated by 1  $\mu\text{m}$ -diameter patchy microcylinder under point-source illumination.

| $\theta$ ( $^{\circ}$ ) | $\beta$ ( $^{\circ}$ ) | $I_{max}$ | FWHM ( $\mu\text{m}$ ) | L ( $\mu\text{m}$ ) | H ( $\mu\text{m}$ ) |
|-------------------------|------------------------|-----------|------------------------|---------------------|---------------------|
| 0 $^{\circ}$            | 38.45 $^{\circ}$       | 1.07      | 0.177                  | 0.42                | 0.073               |
| 10 $^{\circ}$           | 34.15 $^{\circ}$       | 1.01      | 0.228                  | 0.51                | 0.078               |
| 20 $^{\circ}$           | 33.98 $^{\circ}$       | 1.71      | 0.179                  | 0.45                | 0.069               |
| 30 $^{\circ}$           | 29.72 $^{\circ}$       | 1.53      | 0.205                  | 0.66                | 0.088               |
| 45 $^{\circ}$           | 24.18 $^{\circ}$       | 1.67      | 0.198                  | 0.69                | 0.074               |
| 50 $^{\circ}$           | 16.87 $^{\circ}$       | 1.82      | 0.182                  | 0.62                | 0.045               |
| 60 $^{\circ}$           | 0 $^{\circ}$           | 1.84      | 0.168                  | 0.58                | 0                   |
| 70 $^{\circ}$           | -9.02 $^{\circ}$       | 2.55      | 0.130                  | 0.34                | 0.013               |
| 80 $^{\circ}$           | -12.50 $^{\circ}$      | 2.57      | 0.126                  | 0.30                | 0.016               |
| 85 $^{\circ}$           | -16.97 $^{\circ}$      | 2.94      | 0.119                  | 0.19                | 0.014               |
| 90 $^{\circ}$           | -35.68 $^{\circ}$      | 3.13      | 0.112                  | 0.13                | 0.021               |
